# Supplementary material
Source: Royal Society of Chemistry journal article supplement (doi:10.1039/d6nj00629a)
Supplement: d6nj00629a1.pdf [file d6nj00629a1.pdf]

Supporting Information

# Solid-State Fluorescence Sensing of Amine Vapours by an Anthracene based Zn(II) Complex, its Phosphatase Activity and Theoretical Calculations

*Alakananda Mahapatra<sup>a</sup>, Piyali Adak,<sup>a</sup> Shyamal Kumar Chattopadhyay<sup>a\*</sup>*

<sup>a</sup>Department of Chemistry, Indian Institute of Engineering Science and Technology,  
Howrah-711103, W.B. India

\*Corresponding Author, Email: [shch20@hotmail.com](mailto:shch20@hotmail.com)

## List of Contents

| <b>Fig. &amp; Table</b> | <b>Description</b>                                                                                                                                                            |
|-------------------------|-------------------------------------------------------------------------------------------------------------------------------------------------------------------------------|
|                         | Materials and instrumental details                                                                                                                                            |
| Fig. S1                 | ESI-MS spectrum of ligand.                                                                                                                                                    |
| Fig. S2                 | NMR spectrum of ligand.                                                                                                                                                       |
| Fig. S3                 | FTIR spectrum of ligand.                                                                                                                                                      |
| Fig. S4                 | ESI-MS spectrum of complex.                                                                                                                                                   |
| Fig. S5                 | NMR spectrum of complex.                                                                                                                                                      |
| Fig. S6                 | FTIR spectrum of complex.                                                                                                                                                     |
| Fig. S7                 | ORTEP diagram of complex at 50 % probability level.                                                                                                                           |
| Table S1                | X-ray crystallographic data of complex                                                                                                                                        |
| Fig. S8                 | HOMO-LUMO energy diagram of complex.                                                                                                                                          |
| Fig. S9                 | Increase of 4-nitrophenolate band at 421 nm after addition of (a) 20 equiv., (b) 40 equiv., (c) 60 equiv., and (d) 80 equiv. of PNPP to complex solution in DMF/Water medium. |
| Table S2                | Comparison table of phosphatase activity                                                                                                                                      |
| Fig. S10                | Time-dependent spectra of PNPP (a) in presence of ligand and (b) in presence of ZnCl <sub>2</sub> ; (c) time dependent spectra of the complex over a period of 5 h.           |
| Fig. S11                | Solid state emission spectra of complex in presence of different amine vapors at 35 °C.                                                                                       |
| Fig. S12                | Emission spectra of the complex in presence of triethylamine vapour at different temperature.                                                                                 |
|                         | References                                                                                                                                                                    |

## **Materials and instrumental details:**

### ***Materials:***

We have purchased 9-anthracenealdehyde(Sigma-Aldrich 97%), N,N-dimethylethylenediamine(Spectrochem,98%), Sodium borohydride(Spectrochem 96%), Zinc Chloride(Sigma-Aldrich 98%), 4-nitrophenylphosphate disodium salt hexahydrate (Spectrochem 99%) and all amines of reagent grade were used as such. Also DMF, HPLC Water, Acetone, DMSO, Methanol, DCM and absolute ethanol were purchased from Spectrochem Pvt. Ltd.

### ***Instruments:***

We have used FTIR Spectrometer (Agilent Technologies FTIR-630) for FTIR study, (spectrometer region  $4000\text{ cm}^{-1}$  to  $650\text{ cm}^{-1}$ ), BRUKER NMR (400 MHz) for NMR studies( $2.50\text{ ppm }^1\text{H}$  NMR chemical shifts for DMSO),  $\text{D}_2\text{O}$  was used as a reference solvent residue signal. For regular UV-vis spectral analysis, we have used a JASCO UV-V530 spectrophotometer. A Photon Technology International (PTI) spectrophotometer (Horiba, Delta diode) and a multifunctional time-correlated single-photon counting (TCSPC) fluorescence spectrophotometer (Model 1057, Fluorlog, Horiba Scientific Tech., USA) were used to collect the fluorescence data.

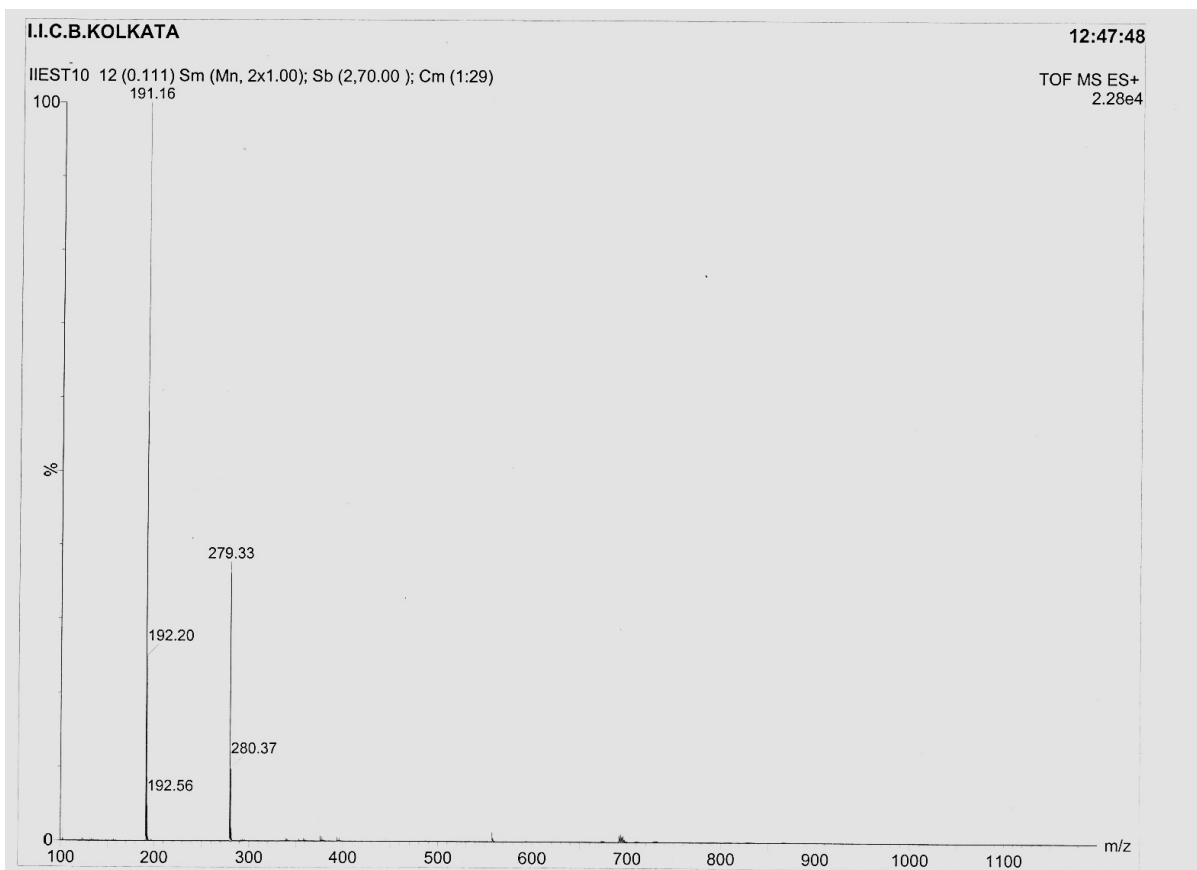

**Figure S1.** ESI-MS spectrum of ligand.

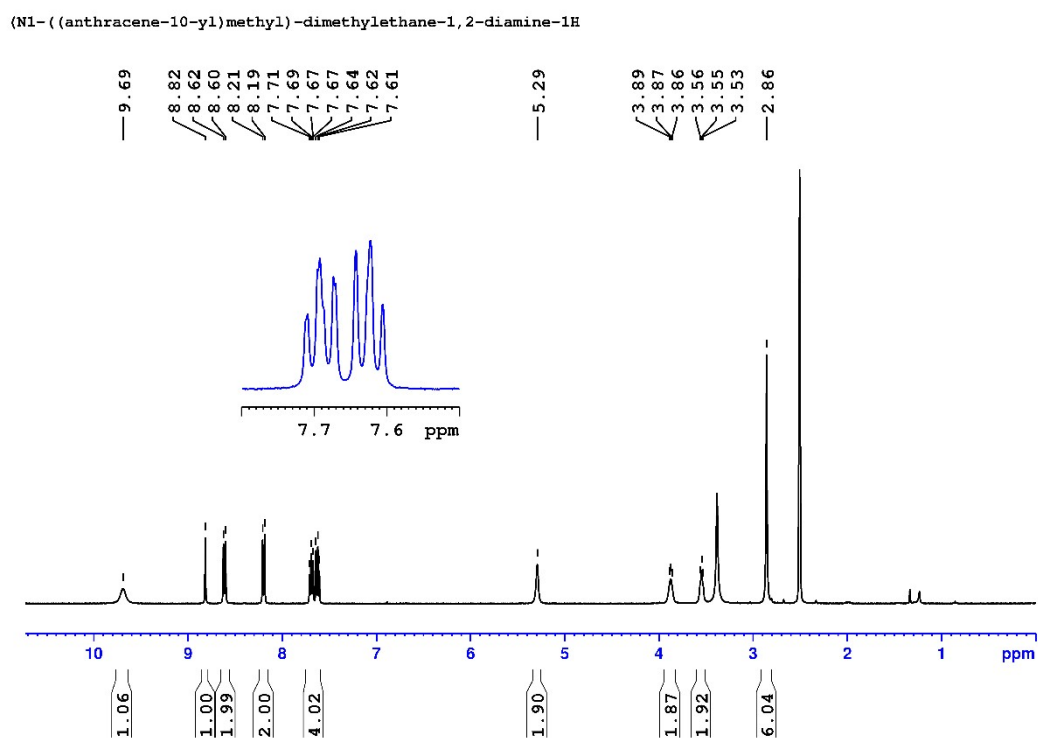

**Figure S2.** NMR spectrum of ligand

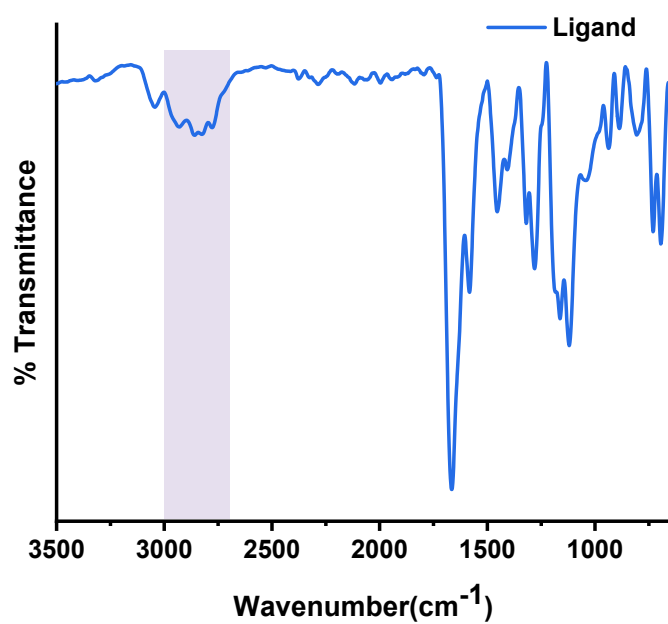

Figure S3. FTIR spectrum of ligand.

:

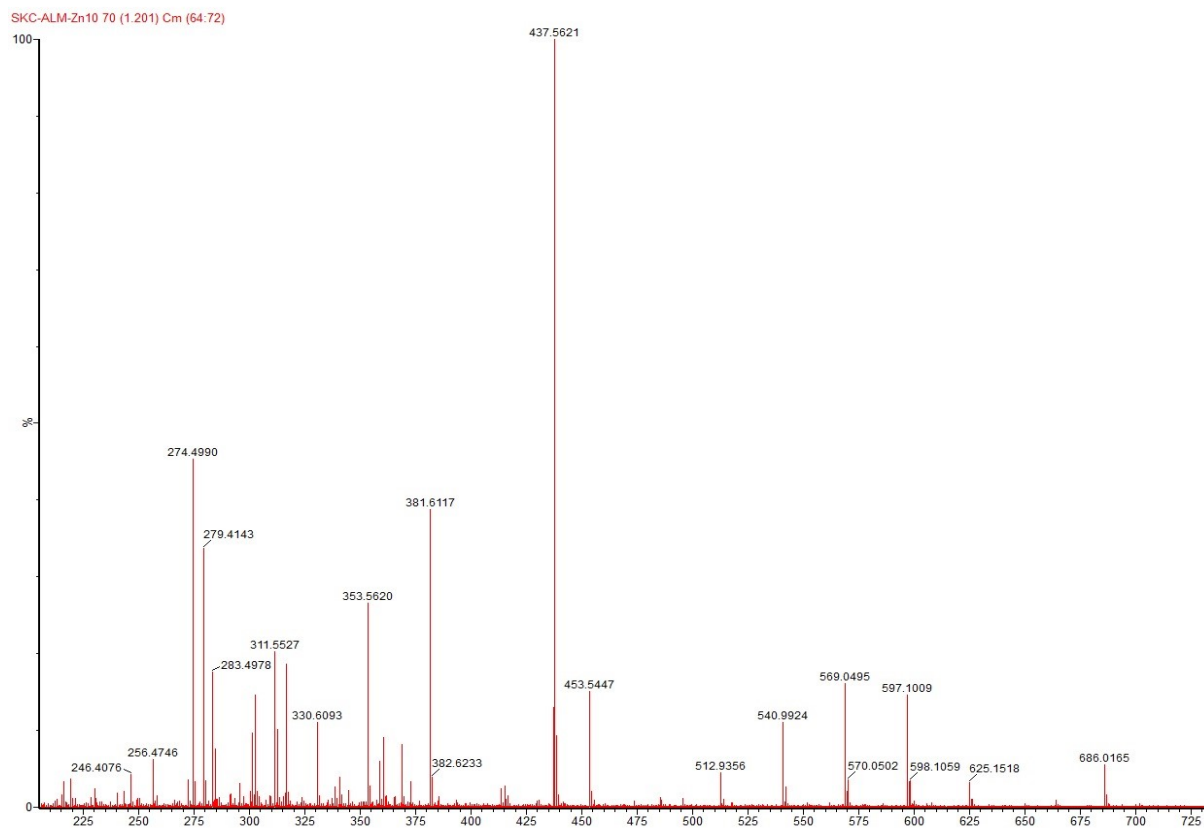

Figure S4. ESI-MS spectrum of complex.

ZnL1-1H

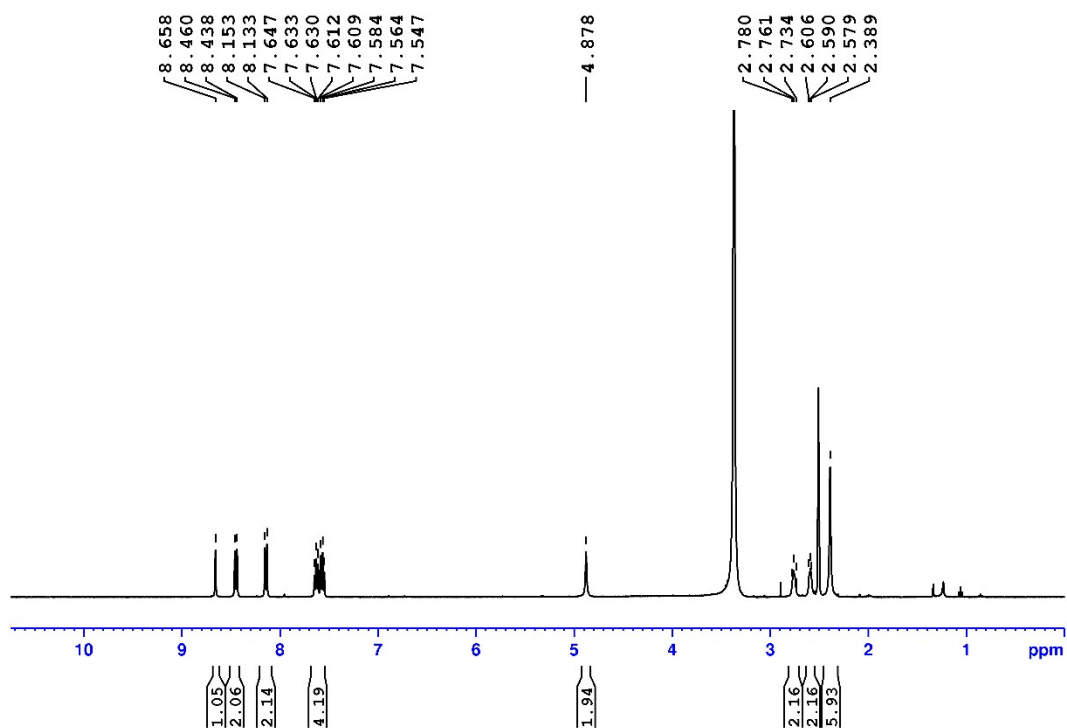

Figure S5. NMR spectrum of complex.

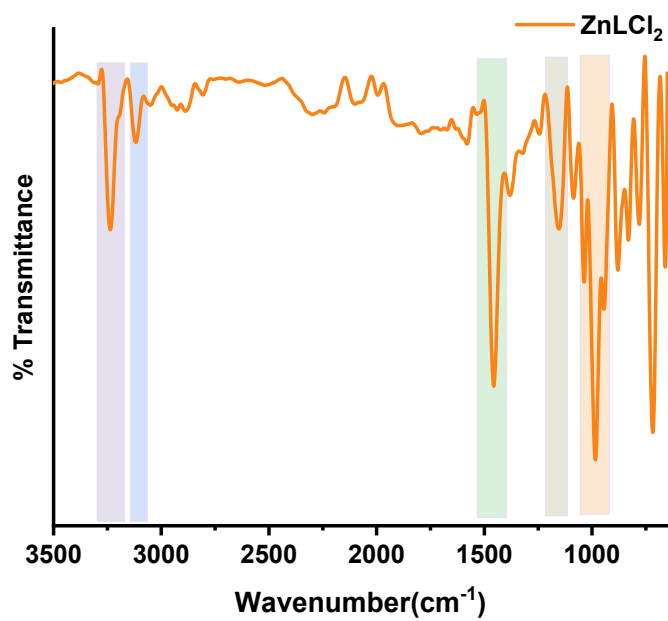

Figure S6. FTIR spectrum of complex.

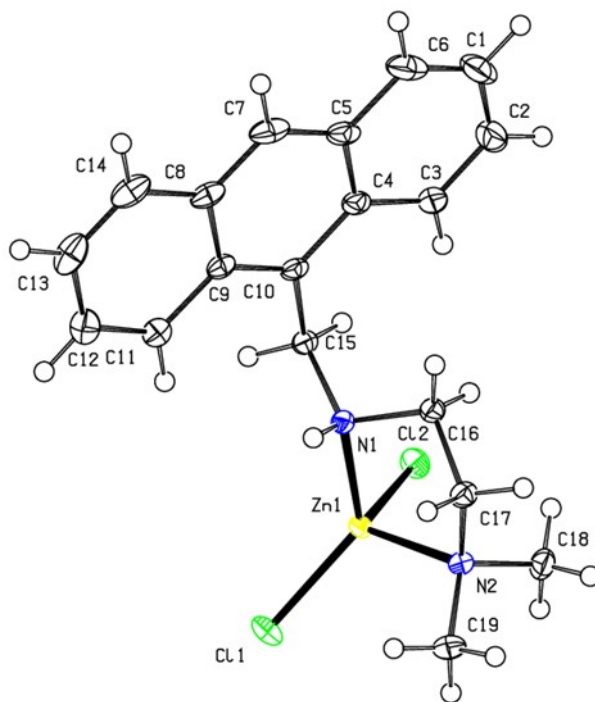

**Figure S7.** ORTEP diagram of complex at 50 % probability level.

**Table S1.** X-ray crystallography data of complex

| Complex                        | ZnLCl <sub>2</sub>                                                |
|--------------------------------|-------------------------------------------------------------------|
| Formula                        | C <sub>19</sub> H <sub>22</sub> Cl <sub>2</sub> N <sub>2</sub> Zn |
| Formula weight                 | 414.65                                                            |
| Crystal size(mm <sup>3</sup> ) | 0.342 × 0.226 × 0.147                                             |
| Temperature                    | 150 K                                                             |
| Crystal system                 | monoclinic                                                        |
| Space group                    | P 1 21/c 1                                                        |
| a (Å)                          | 15.3505(10)                                                       |
| b (Å)                          | 11.9330(7)                                                        |
| c(Å)                           | 10.5063(7)                                                        |
| α(°)                           | 90                                                                |
| β(°)                           | 107.988(7)                                                        |
| γ(°)                           | 90                                                                |
| d <sub>cal</sub>               | 1.505                                                             |
| Z                              | 4                                                                 |

|                                       |                |
|---------------------------------------|----------------|
| $\mu(\text{mm}^{-1})$                 | 4.554          |
| $F(000)$                              | 856            |
| Total Reflections                     | 13117          |
| Unique Reflections                    | 3693           |
| Observed data<br>[ $I > 2\sigma(I)$ ] | 3504           |
| R(int)                                | 0.029          |
| R1, wR2 [ $I > 2\sigma(I)$ ]          | 0.0255, 0.0674 |
| R1, wR2 (all data)                    | 0.0272, 0.0685 |

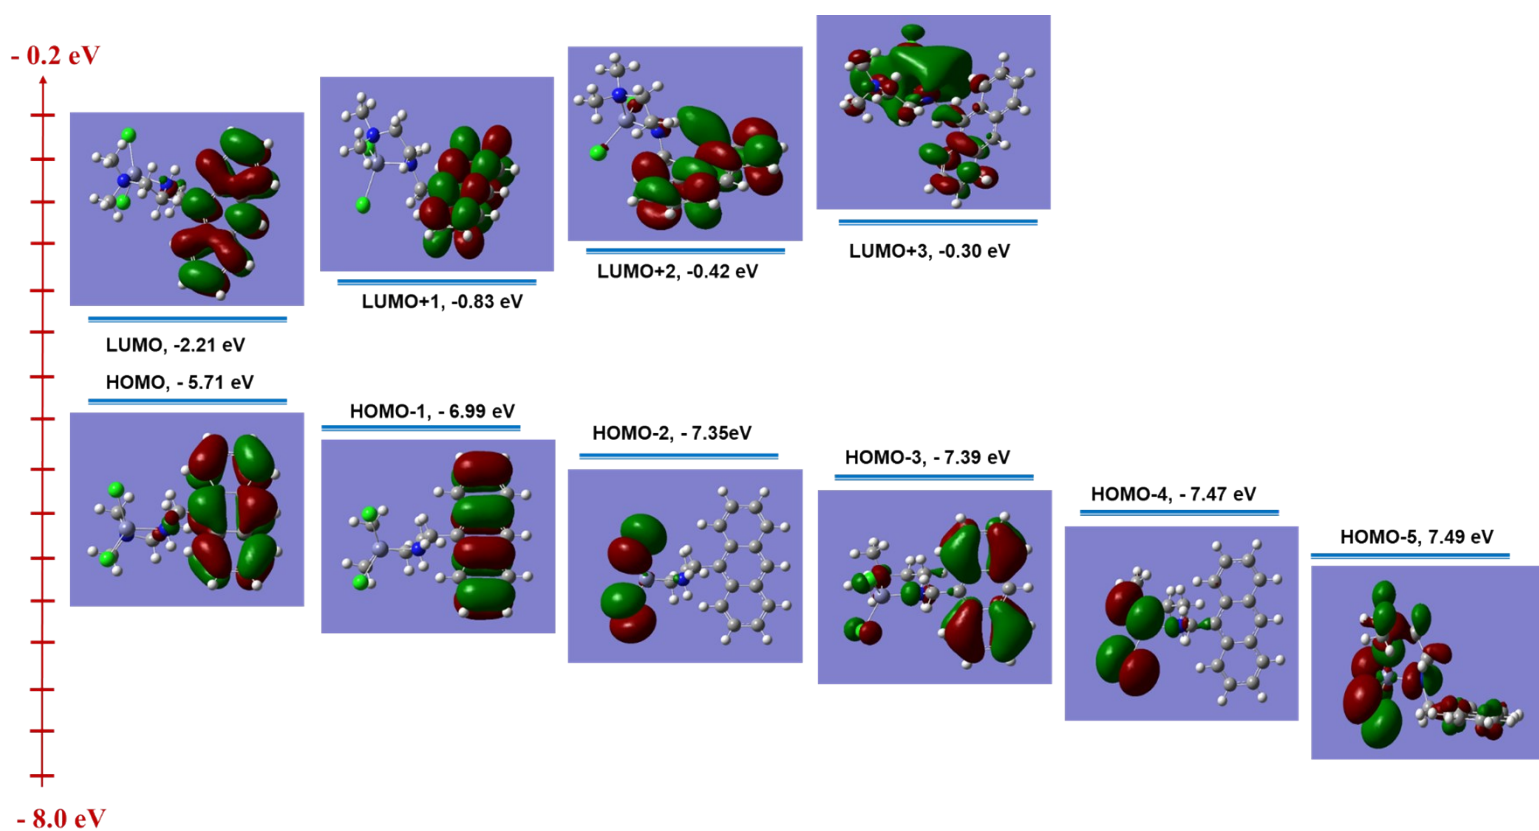

Figure S8. HOMO-LUMO energy diagram of complex.

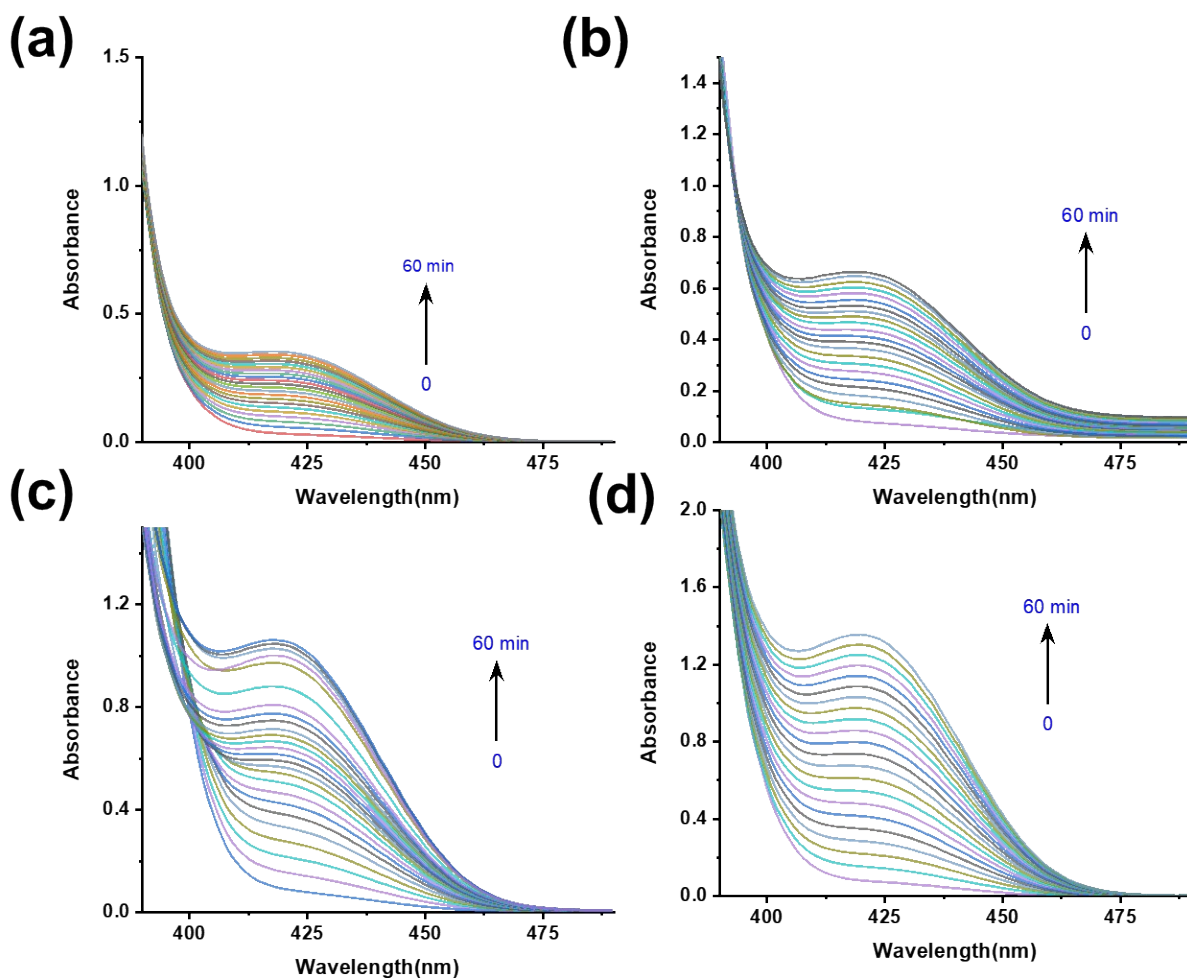

**Figure S9.** Increase of 4-nitrophenolate band at 421 nm after addition of (a) 20 equiv. (b) 40 equiv. (c) 60 equiv. and (d) 80 equiv. of PNPP to complex solution in DMF/Water medium.

**Table S2.** Comparison table of phosphatase activity

| Complex                                                                                                            | Ligand (L)                                                                                    | Substrate for hydrolysis | $k_{\text{cat}}$ ( $\text{h}^{-1}$ ) | Ref                 |
|--------------------------------------------------------------------------------------------------------------------|-----------------------------------------------------------------------------------------------|--------------------------|--------------------------------------|---------------------|
| $[\text{ZnLCl}_2]$                                                                                                 | ( $\text{N}^1$ -(anthracen-9-ylmethyl)- $\text{N}^2, \text{N}^2$ -dimethylethane-1,2-diamine) | PNPP                     | $4.78 \times 10^2$                   | <i>This work</i>    |
| $[\text{Zn}_4(\text{L}^1)_4] \cdot 2\text{H}_2\text{O}$<br>$[\text{Zn}_2(\text{L}^2)_2] \cdot 2\text{H}_2\text{O}$ | 4-(aryl)thiosemicarbazides                                                                    | PNPP                     | 212( $\pm$ 5)<br>38( $\pm$ 2)        | (Adak et al., 2020) |
| $[\text{CoL}_2\text{Cl}_2]$                                                                                        | 1,10-phenanthroline                                                                           | PNPP                     | $3.78 \times 10^2$                   | (Garai et al.,      |

|                                                                                                                                                                                                                                        |                                                                                                                |                                             |                                                |                        |
|----------------------------------------------------------------------------------------------------------------------------------------------------------------------------------------------------------------------------------------|----------------------------------------------------------------------------------------------------------------|---------------------------------------------|------------------------------------------------|------------------------|
|                                                                                                                                                                                                                                        |                                                                                                                |                                             |                                                | 2017)                  |
| $[\text{Zn}_2(\text{L}^1)_2\text{X}_2]$<br>$[\text{Zn}(\text{HL}^2)\text{X}_2]$                                                                                                                                                        | Mannich-base compartmental ligands                                                                             | PNPP                                        | $4.70 \times 10^4$<br>$1.56 \times 10^4$       | (Sanyal et al., 2015)  |
| $[\text{Zn}_2(\text{L}^1)_2\text{X}_2]$<br>$[\text{Zn}(\text{HL}^2)\text{X}_2]$                                                                                                                                                        | Mannich-base ligands                                                                                           | PNPP                                        | $3.36 \times 10^4$<br>$7.2 \times 10^3$        | (Sanyal et al., 2014)  |
| $[\text{Ni}_2\text{L}^{1-5}(\mu\text{-NO}_3)(\text{NO}_3)_2]$                                                                                                                                                                          | Phenol-based compartmental Mannich-base ligands,                                                               | PNPP                                        | $2.16 - 29.2 \times 10^4$                      | (Sanyal et al., 2016)  |
| $\{[\text{Cu}_3(\text{L}^1)(\text{NO}_3)_2(\text{DMF})(\text{H}_2\text{O})] \cdot 3(\text{DMF})\}_n$<br>$[\text{Cu}_3(\text{L}^1)(\text{Cl})_2(\text{DMF})_2]_n$<br>$[\text{Cu}_3(\text{L}^2)(\text{NO}_3)_4(\text{H}_2\text{O})_4]_n$ | one-dimensional coordination polymer                                                                           | HNPP                                        | 34.56                                          | (Hussain et al., 2016) |
| $[\text{Cu}_2(\text{ccdp})(\mu\text{-OAc})]^{2-}$<br>$[\text{Zn}_2(\text{ccdp})(\mu\text{-OAc})]^{2-}$                                                                                                                                 | Carboxylate-rich ligand Hsccdp (N,N'-Bis[2-carboxybenzomethyl]-N,N'-Bis[carboxymethyl]-1,3-diaminopropan-2-ol) | PNPP; (pH 8, 37 °C)<br>BNPP ; (pH 9, 37 °C) | $8.42 \times 10^{-3}$<br>$1.67 \times 10^{-4}$ | (Foley et al., 2021)   |
| $[\text{Zn}_2(\text{L}^1)(\mu\text{-OAc})_2]^{2+}$                                                                                                                                                                                     | 2,6-bis{[bis(2-pyridylmethyl)amino]methyl}-4-t-butylphenoxide                                                  | BDNPP                                       | 1.152                                          | (Pathak et al., 2018)  |

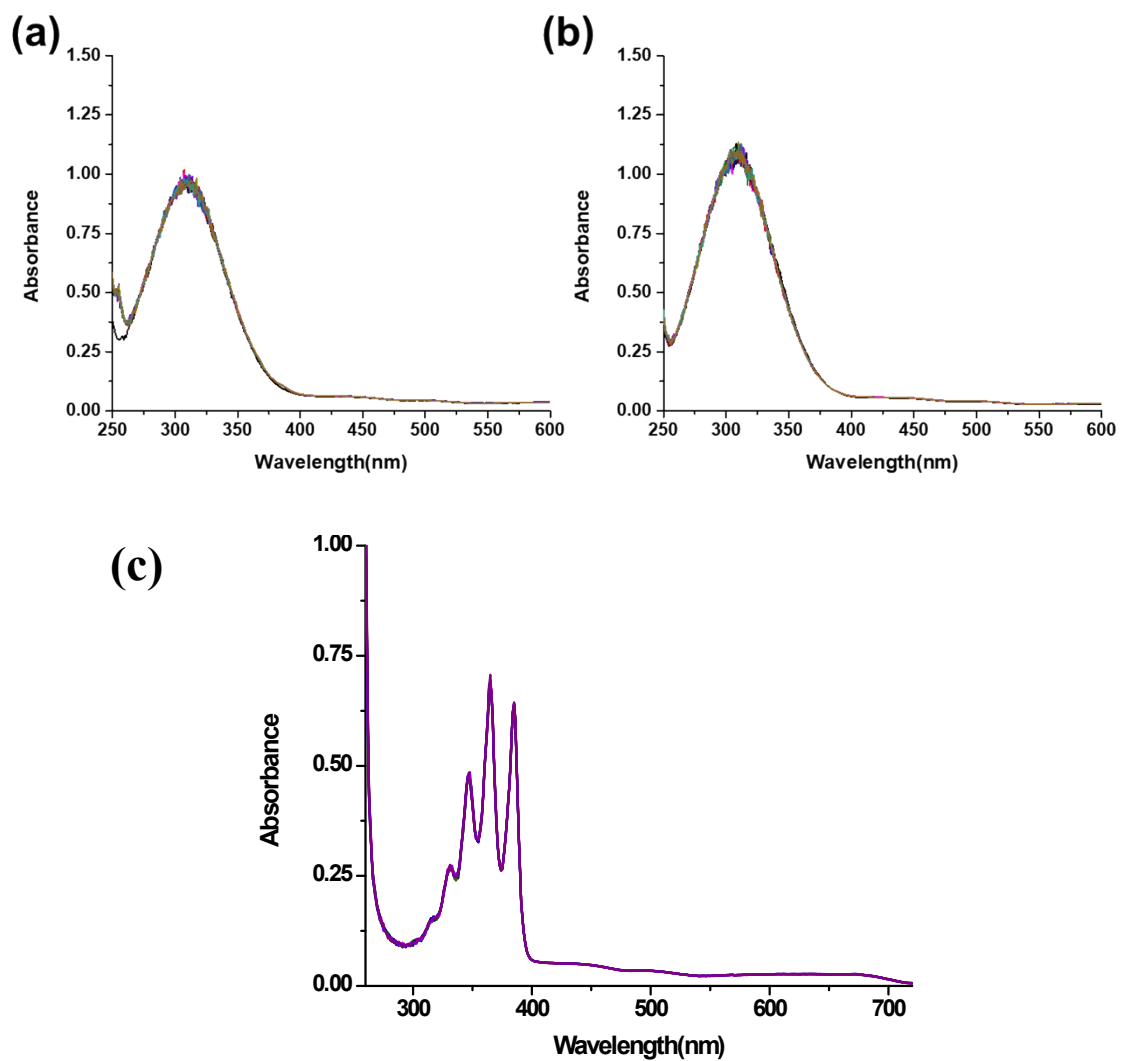

**Figure S10.** Time-dependent spectra of PNPP (a) in presence of ligand and (b) in presence of ZnCl<sub>2</sub>; (c) time dependent spectra of the complex over a period of 5 h at 30 min intervals.

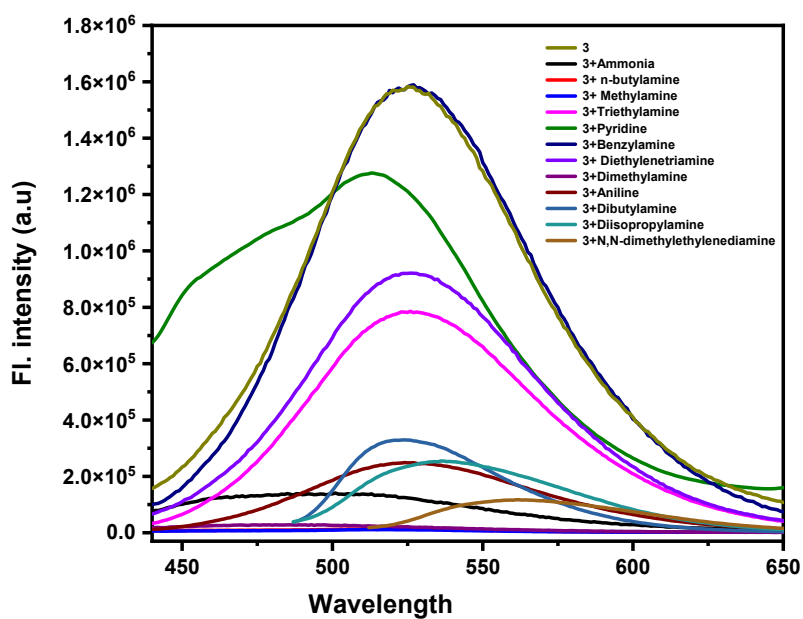

**Figure S11.** Solid state emission spectra of complex in presence of different amine vapors at 35 °C.

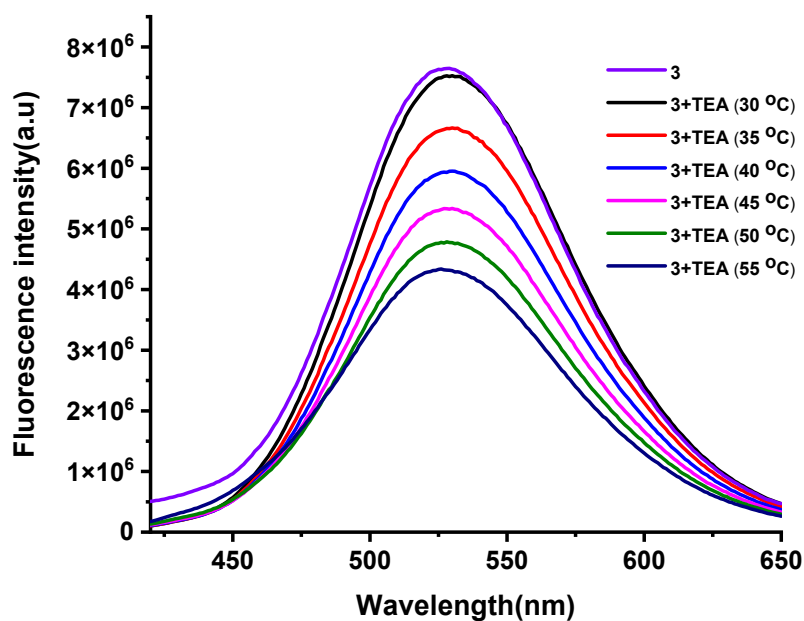

**Figure S12.** Solid state emission spectra of the complex in presence of triethylamine vapour at different temperature.

## Reference:

- 1 P. Adak, B. Ghosh, A. Bauzá, A. Frontera, S. R. Herron and S. K. Chattopadhyay, *RSC Adv.*, 2020, **10**, 12735–12746.
- 2 M. Garai, D. Dey, H. R. Yadav, M. Maji, A. R. Choudhury and B. Biswas, *J. Chem. Sci.*, 2017, **129**, 1513–1520.
- 3 R. Sanyal, P. Chakraborty, E. Zangrando and D. Das, *Polyhedron*, 2015, **97**, 55–65.
- 4 R. Sanyal, A. Guha, T. Ghosh, T. K. Mondal, E. Zangrando and D. Das, *Inorg. Chem.*, 2014, **53**, 85–96.
- 5 R. Sanyal, X. Zhang, P. Chakraborty, F. A. Mautner, C. Zhao and D. Das, *RSC Adv.*, 2016, **6**, 73534–73546.
- 6 N. Hussain, P. Joshi, S. R. Ali and V. K. Bhardwaj, *RSC Adv.*, 2016, **6**, 61528–61535.
- 7 W. Foley, H. Arman and G. T. Musie, *J. Inorg. Biochem.*, 2021, **225**, 111589.
- 8 C. Pathak, D. Kumar, M. K. Gangwar, D. Mhatre, T. Roisnel and P. Ghosh, *J. Inorg. Biochem.*, 2018, **185**, 30–42.
